# Supplementary material for: Bi-Layered Polymer Carriers with Surface Modification by Electrospinning for Potential Wound Care Applications
Source: Pharmaceutics. 2019 Dec 12;11(12):678. doi: 10.3390/pharmaceutics11120678 (PMC6969931; doi:10.3390/pharmaceutics11120678)
Supplement: Supplementary file 1 [file pharmaceutics-11-00678-s001.pdf]

# Supplementary Materials: Bi-Layered Polymer Carriers with Surface Modification by Electrospinning for Potential Wound Care Applications

Mirja Palo, Sophie Rönköharju, Kairi Tiirik, Laura Viidik, Niklas Sandler and Karin Kogermann

Visualization

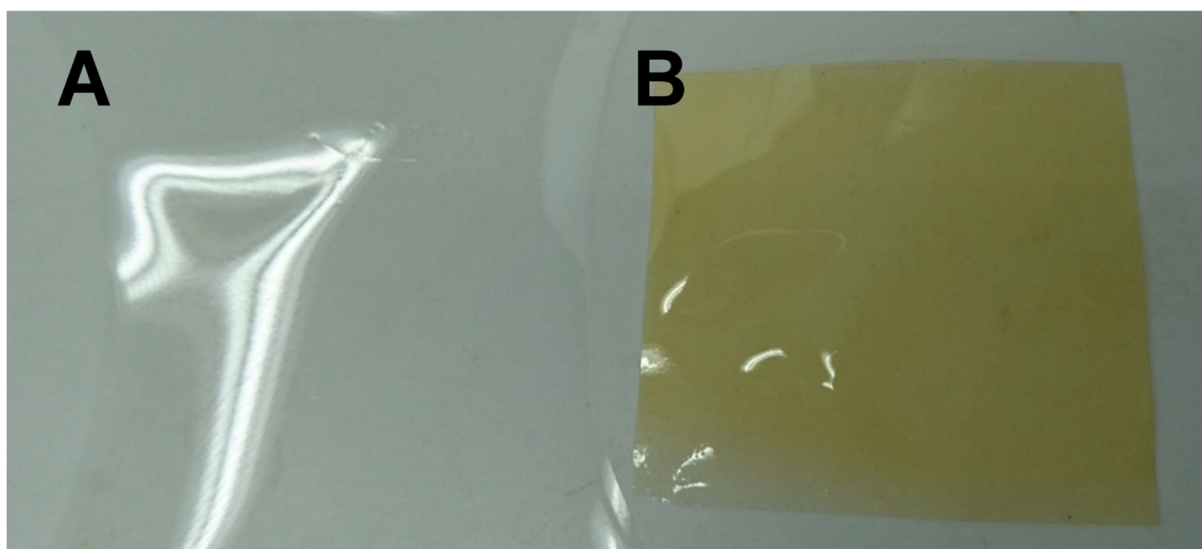

**Figure S1.** Photographic images of non-crosslinked (A) and crosslinked (B) solvent cast (SC) films.

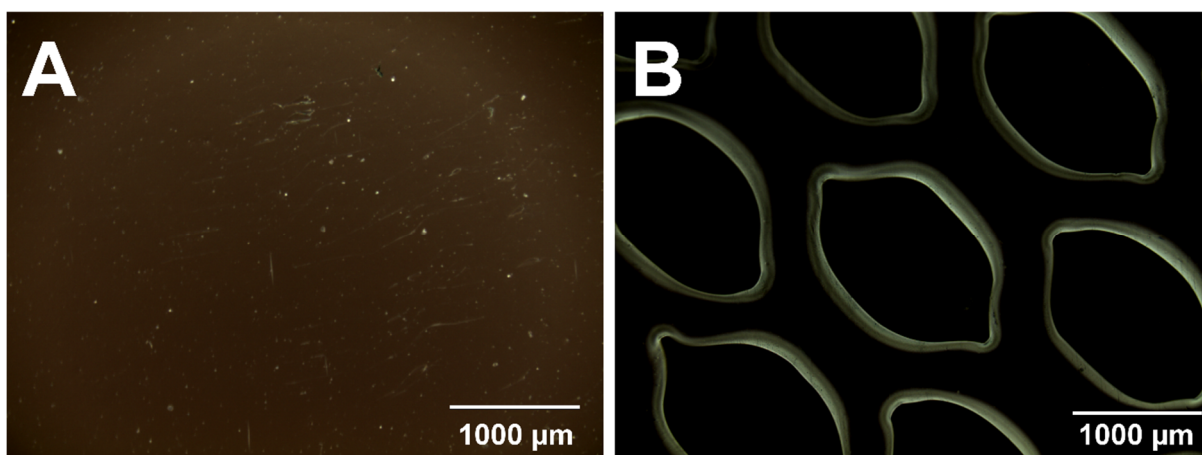

**Figure S2.** Optical microscopy images of non-crosslinked solvent cast (SC) film (A) and bi-layered solvent cast/3D printed (SC/3D) carrier (B).

**Cell safety and viability**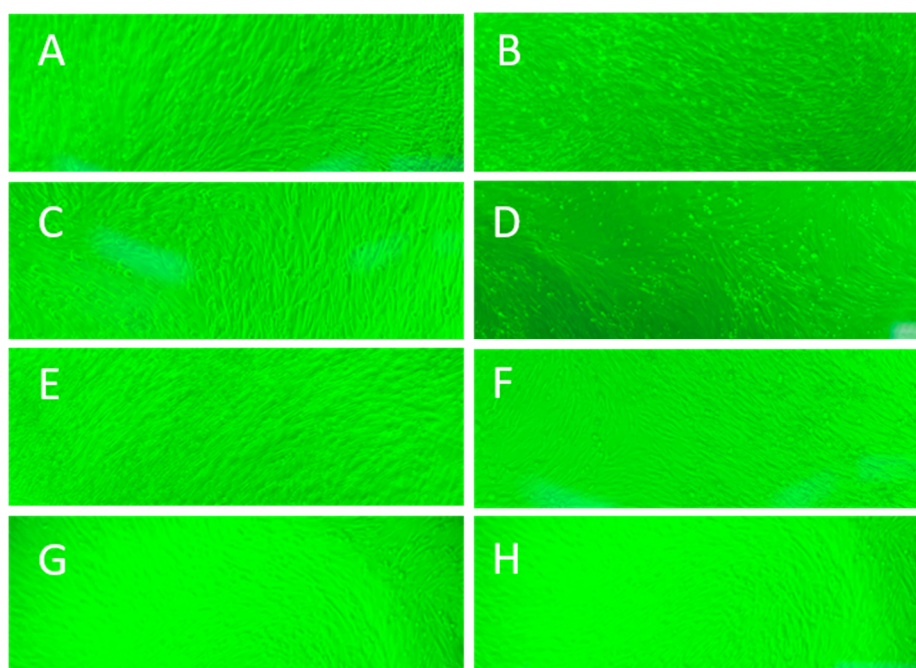

**Figure S3.** Optical microscopy images of baby hamster kidney (BHK-21) fibroblast cells after 24 h of incubation on top of crosslinked solvent cast (SC) film (A), bi-layered electrospun (SC/NF) carrier (C), 3D-printed (SC/3D) carrier (E) and non-crosslinked SC film (B), bi-layered electrospun (SC/NF) carrier (D), 3D-printed (SC/3D) carrier (F) together with positive healthy controls: pure medium with a glass-plate (G) and pure medium in plastic well (H).
